# Supplementary material for: Geochemical Differences, Source apportionment, and Origin Discrimination of Mineral Elements in Soil and Coffee Beans — A Case Study of Puer and Baoshan, the Largest Coffee Producing Regions in China
Source: Research Square preprint supplement (doi:10.21203/rs.3.rs-7269456/v1), 2025-09-09
Supplement: Supplementary file 1 [file 10ece95df8f0486a8e771fbf.docx]

**Geochemical Differences, Source apportionment, and Origin Discrimination of Mineral Elements in Soil and Coffee Beans — A Case Study of Puer and Baoshan, the Largest Coffee Producing Regions in China**

**Shuran Yang1,2*, Qianrui Huang1,2, Yu Lv1,2, Xiaohua Zhou3,4, Mingxing Hou3,4, Youxian Bao3,4**

***Corresponding E-mail: yangshuran1988@foxmail.com**

*1Yunnan Land and Resources Vocational College, Kunming 652501, Yunnan, China*

*2Engineering Center of Yunnan Education Department for Health Geological Survey & Evaluation, Kunming 652501, Yunnan, China*

*3Yunnan Provincial Geological and Mineral Exploration and Development Bureau Central Laboratory, Kunming 650200, Yunnan, China*

*4Key Laboratory of Sanjiang Mineralization Resource Exploration and Utilization, Ministry of Natural Resources, Kunming 650200, Yunnan, China*

Table S1 Detection limits of 11 mineral elements (mg/kg)

| Cr | Cu | Mn | Zn | Fe | Pb | Mo | As | K | Ca | Mg |
| --- | --- | --- | --- | --- | --- | --- | --- | --- | --- | --- |
| 0.05 | 0.05 | 0.05 | 0.50 | 1.0 | 0.02 | 0.01 | 0.002 | 1.0 | 1.0 | 1.0 |

Table S2 Concentrations of 11 mineral elements in soils and coffee beans from Pu'er and Baoshan (mg/kg)

|  | | Cr | Cu | Mn | Zn | Ca | K | Mg | Fe | Pb | Mo | As |
| --- | --- | --- | --- | --- | --- | --- | --- | --- | --- | --- | --- | --- |
| Puer Soil (n=31) | Min  -  Max | 60.50  -  157 | 4.41  -  96.4 | 88.4  -  2850 | 14.8  -  168 | 332  -  131000 | 1120  -  32100 | 1600  -  19000 | 2640  -  61200 | 9.9  -  287 | 0.21  -  5.21 | 3.41  -  27 |
| Mean  ±  SD | 96.2  ±  26.6 | 31.8 ±  18.3 | 817  ±  747 | 66.1 ±  33.3 | 5871  ±  23240 | 20894  ±  7929 | 6330  ±  3270 | 19933  ±  18301 | 60.1  ±  65.2 | 1.28 ±  1.05 | 13.5  ±  6.8 |
| Baoshan Soil (n=54) | Min  -  Max | 57.1  -  236 | 8.94  -  57.2 | 241  -  2550 | 33.7  -  200 | 357  -  5680 | 9410  -  97000 | 2460  -  53200 | 22200  -  72300 | 24.1  -  72.9 | 0.51  -  5.07 | 5.0  -  48.7 |
| Mean  ±  SD | 114  ±  31.1 | 30.0  ±  12.1 | 840  ±  530 | 83.1  ±  32.2 | 2111  ±  1398 | 28322  ±  11553 | 11194  ±  11448 | 47946  ±  14347 | 40.0  ±  9.5 | 1.5  ±  0.7 | 15.7  ±  10.6 |
| Puer Bean  (n=23) | Min  -  Max | 0.00  -  1.18 | 3.06  -  11.3 | 12.1  -  91.5 | 1.02  -  5.15 | 366  -  1404 | 5263  -  16195 | 343  -  2177 | 8.19  -  44.1 | 0.02  -  0.32 | 0.01  -  0.32 | 0.01  -  0.13 |
| Mean  ±  SD | 0.24  ±  0.29 | 5.38  ±  2.12 | 54.1  ±  22.3 | 1.86  ±  1.01 | 717  ±  257 | 7680  ±  2502 | 726  ±  449 | 20.9  ±  9.9 | 0.085  ±  0.07 | 0.10  ±  0.11 | 0.04  ±  0.03 |
| Baoshan Bean  (n=29) | Min  -  Max | 0.26  -  1.93 | 2.60  -  5.2 | 6.06  -  82.3 | 0.80  -  2.44 | 404  -  1340 | 3480  -  5550 | 354  -  668 | 8.95  -  35.1 | 0.02  -  0.07 | 0.05  -  0.19 | 0.00  -  0.04 |
| Mean  ±  SD | 0.76  ±  0.39 | 3.77  ±  0.65 | 21.4  ±  15.5 | 1.36  ±  0.33 | 747  ±  209 | 4472  ±  511 | 486  ±  81 | 14.1  ±  5.44 | 0.03  ±  0.01 | 0.13  ±  0.03 | 0.01  ±  0.01 |

Table S3 ANOVA results of elemental concentration differences in soils and coffee beans between Baoshan and Pu'er coefficient

| Regression Coefficient | | Cr | Cu | Mn | Zn | Ca | K | Mg | Fe | Pb | Mo | As |
| --- | --- | --- | --- | --- | --- | --- | --- | --- | --- | --- | --- | --- |
| Soil | F | 1.885 | 2.012 | 2.519 | 44.32 | 4.202 | 0.924 | 215.998 | 0.259 | 0.606 | 4.159 | 0.407 |
| p | 0.335 | 0.386 | 0.324 | 0.118 | 0.058 | 0.606 | 0.054 | 0.941 | 0.791 | 0.059 | 0.896 |
|  |  |  |  |  |  |  |  |  |  |  |  |  |
| Bean | F | 49.372 | 1.023 | 0.503 | 0.412 | - | 0.393 | 8.943 | 0.477 | 1.959 | 58.516 | 2.619 |
| p | 0.112 | 0.666 | 0.871 | 0.886 | - | 0.875 | 0.259 | 0.837 | 0.171 | 0.103 | 0.233 |

Table S4 BCF values in Pu'er and Baoshan

|  | | Cr | Cu | Mn | Zn | Ca | K | Mg | Fe | Pb | Mo | As |
| --- | --- | --- | --- | --- | --- | --- | --- | --- | --- | --- | --- | --- |
| Puer  (n=31) | Min  -  Max | 0.00  -  0.02 | 0.06  -  0.98 | 0.01  -  0.72 | 0.01  -  0.09 | 0.01  -  2.72 | 0.20  -  14.46 | 0.04  -  0.38 | 0.00  -  0.01 | 0.00  -  0.01 | 0.01  -  0.58 | 0.00  -  0.01 |
| Mean  ±  SD | 0.0028±  0.0034 | 0.2283±  0.1870 | 0.1655±  0.1841 | 0.0345±  0.0231 | 0.6565±  0.6217 | 0.8302±  2.4948 | 0.1323±  0.0872 | 0.0022±  0.0030 | 0.0020±  0.0013 | 0.1066±  0.1288 | 0.0038±  0.0035 |
| Baoshan  (n=54) | Min  -  Max | 0.0023-  0.0190 | 0.0702-  0.3416 | 0.0071-  0.1070 | 0.0052-  0.0418 | 0.1209-  1.7675 | 0.0445-  0.4368 | 0.0102-  0.1846 | 0.0001-  0.0006 | 0.0004-  0.0028 | 0.0177-  0.2353 | 0.0001-  0.0023 |
| Mean  ±  SD | 0.0067±  0.0036 | 0.1513±  0.0708 | 0.0327±  0.0235 | 0.0181±  0.0073 | 0.5479±  0.4220 | 0.1756±  0.0625 | 0.0729±  0.0409 | 0.0003±  0.0001 | 0.0008±  0.0004 | 0.0965±  0.0473 | 0.0008±  0.0005 |

Table S5 ANOVA results of BCF value differences between Pu'er and Baoshan

| Regression Coefficient | Cr | Cu | Mn | Zn | Ca | K | Mg | Fe | Pb | Mo | As |
| --- | --- | --- | --- | --- | --- | --- | --- | --- | --- | --- | --- |
| F | 9.16 | 7.41 | 27.55 | 23.38 | 0.93 | 3.74 | 18.32 | 20.96 | 39.54 | 0.28 | 37.36 |
| p | 0.003 | 0.008 | 0.000 | 0.000 | 0.338 | 0.056 | 0.000 | 0.000 | 0.000 | 0.601 | 0.000 |

Table S6 Concentrations of 11 mineral elements in bedrock from Pu'er and Baoshan

|  | | Cr | Cu | Mn | Zn | Ca | K | Mg | Fe | Pb | Mo | As |
| --- | --- | --- | --- | --- | --- | --- | --- | --- | --- | --- | --- | --- |
| Puer  (n=2) | Min  -  Max | 18.80  -  88.50 | 4.28  -  18.20 | 29.60  -  587 | 12.40  -  77.40 | 2100  -  2700 | 4400  -  30800 | 1000  -  15100 | 7800  -  46900 | 3.22  -  15.70 | 0.12  -  0.79 | 1.98  -  14.40 |
| Mean  ±  SD | 52.57  ±  33.76 | 11.37  ±  6.764 | 257.8  ±  270.2 | 43.47  ±  33.34 | 2450  ±  251 | 16625±  13742 | 6450  ±  6049 | 27750  ±  21510 | 10.78±  5.611 | 0.382±  0.287 | 5.157±  6.162 |
| Baoshan  (n=2) | Min  -  Max | 33.90  -  36.50 | 26.04  -  38.90 | 375  -  541 | 40.99  -  41.10 | 101300  -  194300 | 20700  -  23900 | 5300  -  49300 | 18200  -  18700 | 21.70  -  26.03 | 0.26  -  0.46 | 1.56  -  5.62 |
| Mean  ±  SD | 35.2  ±  1.83 | 32.46±  9.094 | 458  ±  117 | 41.04±  0.075 | 147800  ±  65760 | 22300  ±  2262 | 27300±  31112 | 18450±  353 | 23.86±  3.062 | 0.358±  0.143 | 3.59  ±  2.87 |

Table S7 The enrichment factor (EF) values in soil samples from Pu'er and Baoshan

|  | | Cr | Cu | Mn | Zn | Ca | K | Mg | Fe | Pb | Mo | As |
| --- | --- | --- | --- | --- | --- | --- | --- | --- | --- | --- | --- | --- |
| Puer  n=31 | Min  -  Max | 0.86  -  2.23 | 0.29  -  6.32 | 0.26  -  8.25 | 0.01  -  0.11 | 0.10  -  39.90 | 0.00  -  0.06 | 0.19  -  2.20 | 0.07  -  1.65 | 0.68  -  19.83 | 0.41  -  10.21 | 0.86  -  2.23 |
| Mean  ±  SD | 1.3659  ±  0.3774 | 2.0863  ±  1.2021 | 2.3671  ±  2.1620 | 0.0447  ±  0.0225 | 1.7885  ±  7.0790 | 0.0370  ±  0.0140 | 0.7324  ±  0.3783 | 0.5361  ±  0.4921 | 4.1514  ±  4.5039 | 2.5160  ±  2.0497 | 1.3659  ±  0.3774 |
| Baoshan  n=54 | Min  -  Max | 0.83  -  3.44 | 0.14  -  0.90 | 0.27  -  2.86 | 0.42  -  2.50 | 0.00  -  0.02 | 0.22  -  2.23 | 0.05  -  1.00 | 0.62  -  2.01 | 0.52  -  1.57 | 0.73  -  7.25 | 0.83  -  3.44 |
| Mean  ±  SD | 1.6617  ±  0.4524 | 0.4734  ±  0.1912 | 0.9407  ±  0.5941 | 1.0385  ±  0.4023 | 0.0073  ±  0.0049 | 0.6513  ±  0.2657 | 0.2103  ±  0.2151 | 1.3327  ±  0.3988 | 0.7948  ±  0.2039 | 2.1714  ±  1.0517 | 1.6617  ±  0.4524 |

Table S8 ANOVA results of enrichment factor (EF) value differences between Pu'er and Baoshan

| Regression Coefficient | Cr | Cu | Mn | Zn | Ca | K | Mg | Fe | Pb | Mo | As |
| --- | --- | --- | --- | --- | --- | --- | --- | --- | --- | --- | --- |
| F | 5.397 | 6.370 | 1.754 | 4.124 | 5.058 | 0.670 | 10.469 | 6.461 | 36.528 | 9.256 | 2.408 |
| p | 0.002 | 0.001 | 0.165 | 0.010 | 0.003 | 0.573 | 0.000 | 0.001 | 0.000 | 0.000 | 0.075 |

Table S9 Regression analysis results of 11 mineral element concentrations with pH and organic matter in soils from Pu'er and Baoshan

|  | Puer | | | | | | Baoshan | | | | | |
| --- | --- | --- | --- | --- | --- | --- | --- | --- | --- | --- | --- | --- |
| pH | | | Organic matter | | | pH | | | Organic matter | | |
| R2 | p | β | R2 | p | β | R2 | p | β | R2 | p | β |
| Cr | 0.05 | 0.22 | 12.02 | 0.43 | 0.00 | -1.76 | 0.14 | 0.00 | -17.26 | 0.28 | 0.00 | 16.06 |
| Cu | 0.45 | 0.00 | 24.74 | 0.38 | 0.00 | -1.14 | 0.08 | 0.04 | -4.89 | 0.44 | 0.00 | 7.86 |
| Mn | 0.16 | 0.03 | 592.89 | 0.21 | 0.01 | -34.73 | 0.21 | 0.00 | -357.67 | 0.26 | 0.00 | 267.60 |
| Zn | 0.32 | 0.00 | 37.70 | 0.23 | 0.01 | -1.63 | 0.07 | 0.06 | -12.33 | 0.32 | 0.00 | 17.99 |
| Ca | 0.16 | 0.03 | 18447 | 0.02 | 0.41 | -364.36 | 0.40 | 0.00 | -1284.4 | 0.00 | 0.82 | -43.31 |
| K | 0.10 | 0.08 | 5069.7 | 0.03 | 0.33 | -145.44 | 0.05 | 0.12 | 3601.35 | 0.00 | 0.62 | -784.57 |
| Mg | 0.28 | 0.00 | 3484.5 | 0.21 | 0.01 | -153.49 | 0.13 | 0.01 | 6014.02 | 0.01 | 0.48 | -1105 |
| Fe | 0.23 | 0.01 | -1763 | 0.65 | 0.00 | 1501.63 | 0.05 | 0.09 | -4890.2 | 0.38 | 0.00 | 8732.96 |
| Pb | 0.28 | 0.00 | 69.90 | 0.29 | 0.00 | -3.58 | 0.04 | 0.16 | -2.67 | 0.03 | 0.18 | 1.72 |
| Mo | 0.00 | 0.74 | 0.13 | 0.15 | 0.03 | -0.04 | 0.01 | 0.54 | -0.09 | 0.17 | 0.00 | 0.30 |
| As | 0.05 | 0.23 | -3.01 | 0.10 | 0.08 | 0.22 | 0.00 | 0.86 | -0.38 | 0.11 | 0.01 | 3.46 |

Table S10. Matrix of rotated component for soil mineral elements in Pu’er and Baoshan

|  | Puer | | | Baoshan | | |  |
| --- | --- | --- | --- | --- | --- | --- | --- |
|  | PCp1 Loadings | PCp2 Loadings | PCp3 Loadings | PCb1 Loadings | PCb2 Loadings | PCb3 Loadings | PCb4 Loadings |
| Cr | 0.474 | 0.686 | -0.192 | 0.884 | 0.163 | 0.044 | 0.002 |
| Cu | 0.944 | 0.028 | 0.085 | 0.897 | 0.248 | 0.163 | 0.116 |
| Mn | 0.820 | 0.183 | 0.180 | 0.267 | 0.115 | 0.881 | 0.028 |
| Zn | 0.642 | -0.050 | 0.339 | 0.431 | 0.747 | 0.207 | 0.001 |
| Ca | 0.618 | -0.575 | -0.028 | 0.125 | -0.092 | -0.536 | 0.694 |
| K | 0.349 | -0.115 | 0.613 | -0.173 | -0.077 | -0.011 | -0.572 |
| Mg | 0.784 | -0.461 | -0.062 | -0.423 | -0.162 | 0.276 | 0.628 |
| Fe | -0.609 | -0.384 | 0.575 | 0.816 | 0.435 | 0.133 | 0.118 |
| Pb | 0.933 | -0.067 | -0.005 | 0.004 | 0.897 | 0.207 | -0.032 |
| Mo | 0.278 | 0.785 | 0.074 | 0.451 | 0.698 | 0.055 | 0.100 |
| As | -0.239 | 0.430 | 0.701 | 0.280 | 0.804 | -0.210 | -0.092 |
| % of Variance | 42.69 | 18.34 | 12.71 | 42.86 | 13.17 | 10.87 | 9.6 |
| Cumulative | 42.69 | 61.03 | 73.74 | 42.86 | 56.03 | 66.90 | 76.50 |
